# Supplementary material for: KIT and FLT3-ITD Mutations Do Not Predict Outcomes in Pediatric Core-Binding Factor Acute Myeloid Leukemia: Findings from the C-HUANAN-AML-15 Multicenter Cohort Study
Source: Research Square preprint supplement (doi:10.21203/rs.3.rs-8473547/v1), 2026-01-12
Supplement: Supplementary file 1 [file 7d00e3c0468494f2bc36791a.docx]

**Journal:** Annals of Hematology

***KIT* and *FLT3*-ITD Mutations Do Not Predict Outcomes in Pediatric Core-Binding Factor Acute Myeloid Leukemia: Findings from the C-HUANAN-AML-15 Multicenter Cohort Study**

Yongzhi Zheng1△, Lihua Yu2△, Shaohua Le1, Nainong Li1, Xiaoqin Feng3, Chunfu Li4, Mincui Zheng5, Huirong Mai6, Hua Jiang7, Xiangling He8, Hong Wen9, Honggui Xu10, Chun Chen11, Lihua Yang2#

1Department of Paeditric Hematology, Fujian Institute of Hematology, Fujian Provincial Key Laboratory on Hematology, Fujian Medical University Union Hospital, Fuzhou, China

2Department of Pediatrics, Zhujiang Hospital of Southern Medical University, Guangzhou, China

3Department of Pediatrics, Nanfang Hospital, Southern Medical University, Guangzhou, China

4Nanfang-Chunfu Children’s Institute of Hematology & Oncology, TaiXin Hospital, Dongguan, China

5Department of Pediatric Hematology/Oncology, Hematology and Oncology, Hunan Children’s Hospital, Changsha, China

6Department of Pediatric Hematology/Oncology, Shenzhen Children’s Hospital, Shenzhen, China

7Department of Pediatric Hematoloy/Oncology, Guangzhou Women and Children’s Medical Center, Guangzhou, China

8Paeditrics, People’s Hospital of Hunan Province, Changsha, China

9Paeditrics, The First Affiliated Hospital of Xiamen University, Xiamen, China

10Paeditrics, Sun Yat-sen Memorial Hospital, Sun Yat-sen University, Guangzhou, China

11Paeditrics, the Seventh Affiliated Hospital, Sun Yat-sen University, Guangzhou, China

△Yongzhi Zheng and Lihua Yu contributed equally to this work and share first authorship.

**#Corresponding author:** Lihua Yang

Department of Pediatrics, Zhujiang Hospital of Southern Medical University, No. 253, Gongye Avenue Middle, Guangzhou, Guangdong Province, China

Phone number: +86 13580532469

Email: [dryanglihua@163.com](mailto:dryanglihua@163.com)

**Supplementary Information**

**

**

**Online Resource 1. Treatment schema for the C-HUANAN-AML-15 protocol**

**Online Resource 2.** Comparison of characteristics between 289 pediatric patients with CBF-AML and 586 with other AML subtypes

| Characteristic | All patients (n=875) | | CBF-AML (n=289) | | Non-CBF-AML (n=586) | | *P* value |
| --- | --- | --- | --- | --- | --- | --- | --- |
|  | No. | % | No. | % | No. | % |  |
| Age ≥120 months | 223 | 25.5 | 89 | 30.8 | 134 | 22.9 | 0.013 |
| Sex (male) | 504 | 57.6 | 174 | 60.2 | 330 | 56.3 | 0.247 |
| WBC ≥50 × 109/L | 240 | 27.4 | 63 | 21.8 | 177 | 30.2 | 0.012 |
| Extramedullary involvement | 84 | 9.6 | 51 | 17.6 | 33 | 5.6 | 0.000 |
| *KIT* mutations | 115 | 13.1 | 103 | 35.6 | 12 | 2.0 | 0.000 |
| *FLT3* mutations | 130 | 14.9 | 28 | 9.7 | 111 | 18.9 | 0.001 |
| *ASXL1* mutations | 151 | 17.3 | 52 | 18.0 | 99 | 16.9 | 0.864 |
| aCR at TP1 | 732 | 83.7 | 268 | 92.7 | 464 | 79.2 | 0.000 |
| aCR at TP2 | 797 | 91.1 | 276 | 95.5 | 521 | 88.9 | 0.003 |
| 5-year OS rate |  |  | 87.2% ± 2.1% | | 72.5% ± 2.0% | | <0.001 |
| 5-year EFS rate |  |  | 80.7% ± 2.4% | | 60.9% ± 2.2% | | <0.001 |
| 5-year CIR rate |  |  | 9.9% ± 1.9% | | 25.1% ± 2.1% | | <0.001 |

Note: a, early treatment response was assessed at two predefined time points: days 28–35 after the first induction course (time point 1 [TP1]) and after the second induction course, immediately before consolidation therapy (time point 2 [TP2]).

Abbreviations: CBF-AML, core-binding factor acute myeloid leukemia; WBC, white blood cells count; CR, complete remission; OS, overall survival; EFS, event-free survival; CIR, cumulative incidence of relapse.

**
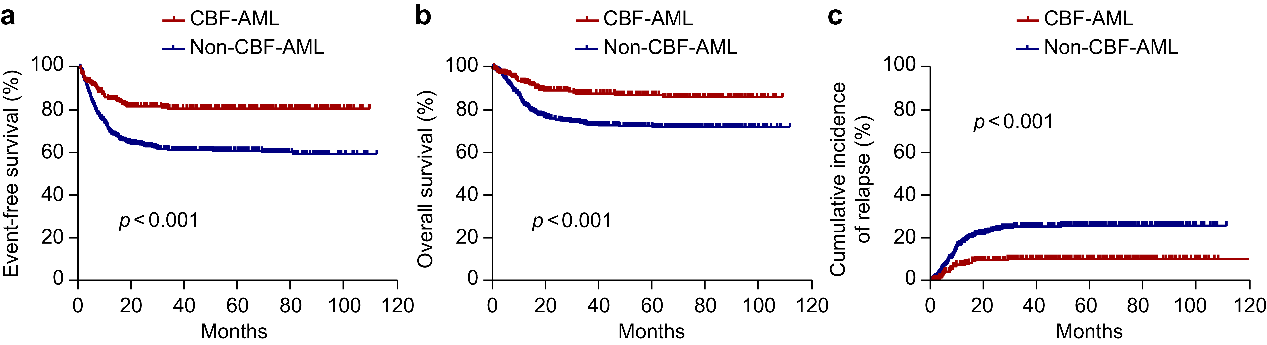
**

**Online Resource 3. Comparative long-term outcomes between CBF-AML and non-CBF-AML**
Kaplan–Meier estimates for (a) event-free survival (EFS), (b) overall survival (OS), and (c) cumulative incidence of relapse (CIR).

CBF-AML (n = 289) *vs.* non-CBF-AML (n = 586):

- EFS: 5-year 80.7% ± 2.4% *vs.* 60.9% ± 2.2% (*P* < 0.001, log-rank)
- OS: 5-year 87.2% ± 2.1% *vs.* 72.5% ± 2.0% (*P* < 0.001, log-rank)
- CIR: 9.9% ± 1.9% *vs.* 25.1% ± 2.1% (*P* < 0.001, Gray’s test)

Significant differences were observed between the endpoints. Error bars/ribbons represent ±1 standard error.

**Online Resource 4.** Clinical characteristics of CBF-AML with and without *KIT* mutations

| Characteristic | *KIT*-mut (n = 103) | *KIT*-wt (n = 186) | *P* value |
| --- | --- | --- | --- |
| Chimera transcript type, n (%) |  |  | 0.902 |
| *RUNX1::RUNX1T1* | 82 (79.6) | 149 (80.1) |  |
| *CBFβ::MYH11* | 21 (20.4) | 37 (19.9) |  |
| Age, months |  |  | 0.901 |
| Median | 78 | 93 |  |
| Range | 10–168 | 7–168 |  |
| Sex, n (%) |  |  | 0.772 |
| Male | 61 (59.2) | 113 (60.8) |  |
| Female | 42 (40.8) | 73 (39.2) |  |
| Extramedullary, n (%) | 27 (26.2) | 24 (13.3) | 0.004 |
| WBC, ×109/L |  |  | 0.623 |
| Median | 21.2 | 20.1 |  |
| Range | 0.1–390 | 1–293.4 |  |
| Induction therapy, n (%) |  |  | 0.062 |
| FLAG-IDA | 84 (81.6) | 134 (72.0) |  |
| DAE | 19 (18.4) | 52 (28.0) |  |
| Additional cytogenetic abnormalities (n = 278), n/N (%) | |  |  |
| Loss of X/Y | 36/98 (36.7) | 42/180 (23.3) | 0.017 |
| Trisomy 4 | 7/98 (7.1) | 0/180 (0) | 0.001 |
| Trisomy 22 | 4/98 (4.1) | 2/180 (1.1) | 0.189 |
| del(9q) | 2/98 (2.0) | 10/180 (5.6) | 0.224 |
| del(7q)/-7 | 3/98 (3.1) | 5/180 (2.8) | 1.000 |

Abbreviations: CBF-AML, core-binding factor acute myeloid leukemia; WBC, white blood cell; FLAG-IDA, fludarabine, cytarabine, granulocyte colony-stimulating factor, and idarubicin; DAE,daunorubicin, cytarabine, etoposide.

**Online Resource 5.** Number of identified *KIT* mutations in pediatric patients with CBF-AML

| Site of KIT mutation | Overall  (n = 117) | *RUNX1::RUNX1T1*  (n = 95) | *CBF::MYH11*  (n = 22) |
| --- | --- | --- | --- |
| Exon 8 | 30 | 21 | 9 |
| T417_D419delinsV | 5 | 2 | 3 |
| &T417_D419delinsL | 5 | 3 | 2 |
| Y418_D419del | 5 | 5 | 0 |
| #Y418_D419delinsY | 1 | 1 | 0 |
| Y418_D419insFL | 1 | 0 | 1 |
| @D419del | 13 | 10 | 3 |
| Exon 17 | 79 | 66 | 13 |
| %øD816V | 16 | 11 | 5 |
| &#àD816Y | 18 | 12 | 6 |
| ÍD816H | 5 | 5 | 0 |
| %*$D820G | 4 | 4 | 0 |
| $D820Y | 3 | 3 | 0 |
| @*ÍøàN822K | 33 | 31 | 2 |
| Exon 9 | 2 | 2 | 0 |
| S501delinsSR | 1 | 1 | 0 |
| F522C | 1 | 1 | 0 |
| Exon 10-11 | 6 | 6 | 0 |
| M541L | 3 | 3 | 0 |
| @V559A | 1 | 1 | 0 |
| Y570delinsYIDPTQLPYDHKWEFH | 1 | 1 | 0 |
| V559D | 1 | 1 | 0 |

&#@%øàÍ*$These mutations coexisted in the same patient.

**
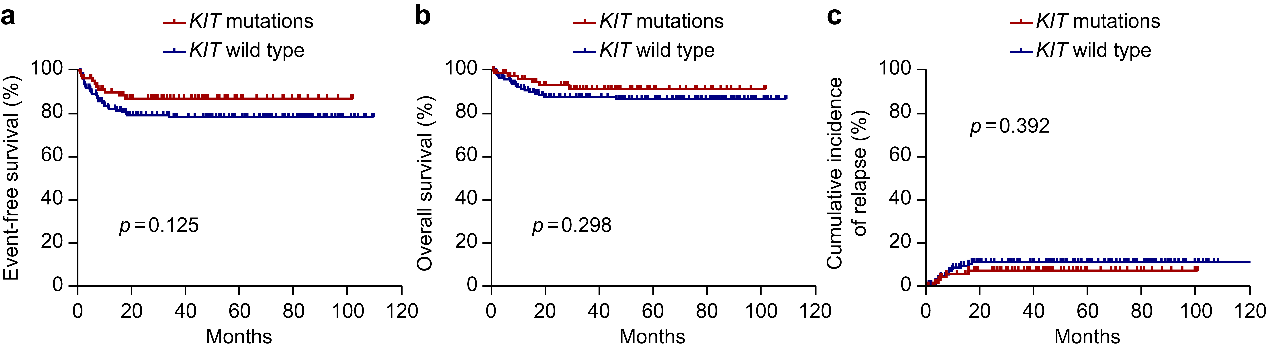
**

**Online Resource 6. Prognostic impact of *KIT* mutations in pediatric patients with *RUNX1::RUNX1T1* fusion gene**
Kaplan–Meier estimates for (a) event-free survival (EFS), (b) overall survival (OS), and (c) cumulative incidence of relapse (CIR).

*KIT* mutations (n = 82) *vs.* KIT wild type (n = 149):

- EFS: 5-year 87.0% ± 3.9% *vs.* 78.3% ± 3.5% (*P* = 0.125, log-rank)
- OS: 5-year 91.4% ± 3.4% *vs.* 86.7% ± 3.0% (*P* = 0.298, log-rank)
- CIR: 7.1% ± 3.1% *vs.* 11.1% ± 2.8% (*P* = 0.392, Gray’s test)

No significant differences were observed between the endpoints. Error bars/ribbons represent ±1 standard error.

**
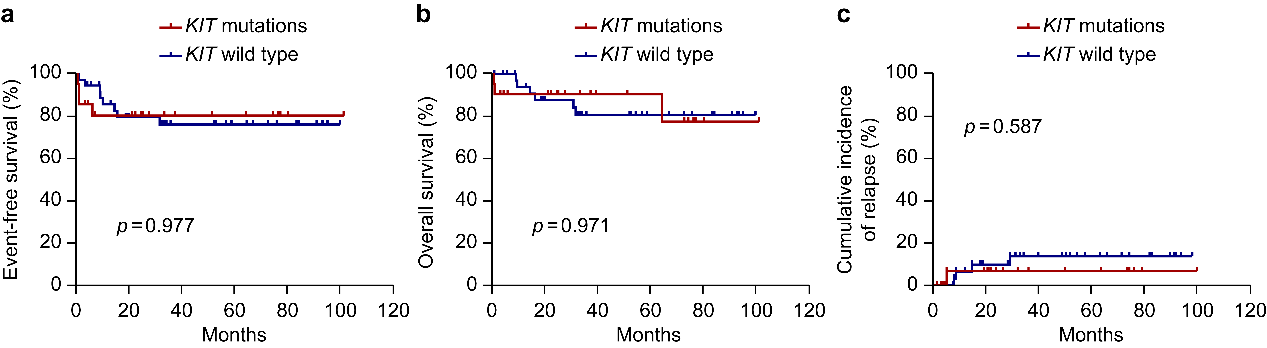
**

**Online Resource 7. Prognostic impact of *KIT* mutations in pediatric patients with *CBFβ::MYH11* fusion gene**
Kaplan–Meier estimates for (a) event-free survival (EFS), (b) overall survival (OS), and (c) cumulative incidence of relapse (CIR).

*KIT* mutations (n = 21) *vs. KIT* wild type (n = 37):

- EFS: 5-year 80.4% ± 8.8% *vs.* 76.1% ± 7.4% (*P* = 0.977, log-rank)
- OS: 5-year 90.5% ± 6.4% *vs.* 80.7% ± 7.1% (*P* = 0.971, log-rank)
- CIR: 6.7% ± 6.4% *vs.* 13.7% ± 6.4% (*P* = 0.587, Gray’s test)

No significant differences were observed across endpoints. Error bars/ribbons represent ±1 standard error.

**
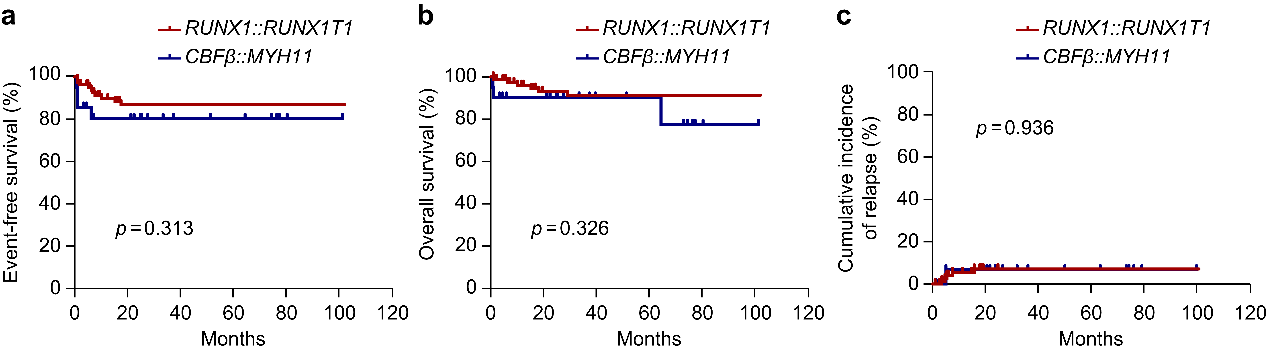
**

**Online Resource 8. Prognostic impact of chimera transcript type in pediatric patients with *KIT* mutations**

Kaplan–Meier estimates for (a) event-free survival (EFS), (b) overall survival (OS), and (c) cumulative incidence of relapse (CIR).

*RUNX1::RUNX1T1* (n = 82) *vs. CBFβ::MYH11* (n = 21):

- EFS: 5-year 87.0% ± 3.9% *vs.* 80.4% ± 8.8% (*P* = 0.313, log-rank)
- OS: 5-year 91.4% ± 3.4% *vs.* 90.5% ± 6.4% (*P* = 0.326, log-rank)
- CIR: 7.1% ± 3.1% *vs.* 6.7% ± 6.4% (*P* = 0.936, Gray’s test)

No significant differences were observed across endpoints. Error bars/ribbons represent ±1 standard error.

**
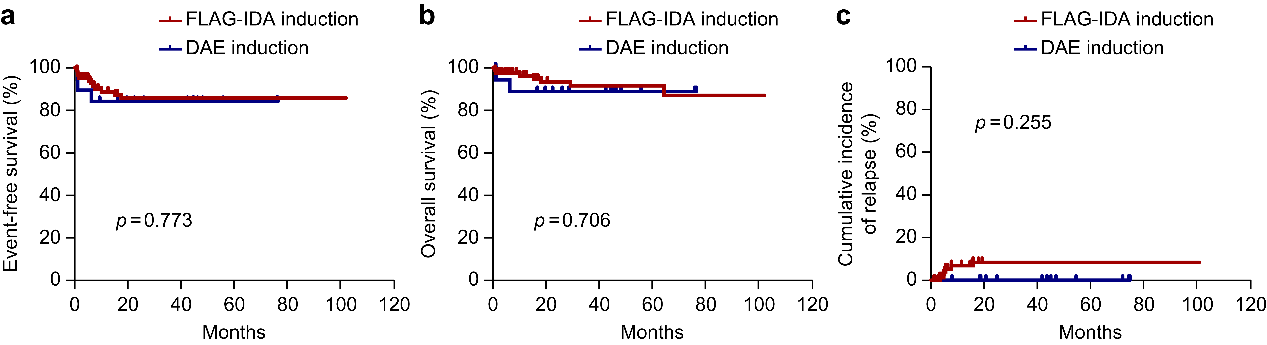
**

**Online Resource 9. Prognostic impact of induction regimen in pediatric patients with *KIT* mutations**

Kaplan–Meier estimates for (a) event-free survival (EFS), (b) overall survival (OS), and (c) cumulative incidence of relapse (CIR).

FLAG-IDA (n = 84) *vs.* DAE (n = 19):

- EFS: 5-year 85.9% ± 4.0% *vs.* 84.2% ± 8.4% (*P* = 0.773, log-rank)
- OS: 5-year 91.6% ± 3.3% *vs.* 88.9% ± 7.4% (*P* = 0.706, log-rank)
- CIR: 8.4% ± 3.3% *vs.* 0% (*P* = 0.255, Gray’s test)

No significant differences were observed across endpoints. Error bars/ribbons represent ±1 standard error.

**Online Resource 10.** Clinical characteristics of CBF-AML with and without *FLT3-*ITDmutations

| Characteristic | *FLT3-*ITD (n=16) | *FLT3*-wt (n=273) | *P* value |
| --- | --- | --- | --- |
| Chimera transcript type, n (%) |  |  | 0.747 |
| *RUNX1::RUNX1T1* | 14 (87.5) | 217 (79.5) |  |
| *CBFβ::MYH11* | 2 (12.5) | 56 (20.5) |  |
| Age, months |  |  | 0.808 |
| Median | 75 | 94 |  |
| Range | 30–168 | 7–168 |  |
| Sex, n (%) |  |  | 0.772 |
| Male | 14 (59.2) | 160 (58.6) |  |
| Female | 2 (40.8) | 113 (41.4) |  |
| Extramedullary involvement, n (%) | 3 (26.2) | 48 (17.6) | 1.000 |
| WBC, ×109/L |  |  | 0.069 |
| Median | 30.8 | 19.5 |  |
| Range | 6.8–223.7 | 0.1–390 |  |
| Induction therapy, n (%) |  |  | 0.131 |
| FLAG-IDA | 15 (93.8) | 203 (74.4) |  |
| DAE | 1 (6.2) | 70 (25.6) |  |
| Additional cytogenetic abnormalities (n=278), n/N (%) | |  |  |
| Loss of X/Y | 6/16 (37.5) | 72/262 (26.4) | 0.397 |
| Trisomy 4 | 0/16 (0) | 7/262 (2.6) | 1.000 |
| Trisomy 22 | 1/16 (6.3) | 5/262 (1.8) | 0.302 |
| del(9q) | 0/16 (0) | 12/262 (4.4) | 1.000 |
| del(7q)/-7 | 0/16 (0) | 8/262 (2.9) | 1.000 |

Abbreviations: CBF-AML, core-binding factor acute myeloid leukemia; WBC, white blood cell count; FLAG-IDA, fludarabine, cytarabine, granulocyte colony-stimulating factor, and idarubicin; DAE,daunorubicin, cytarabine, etoposide.

**
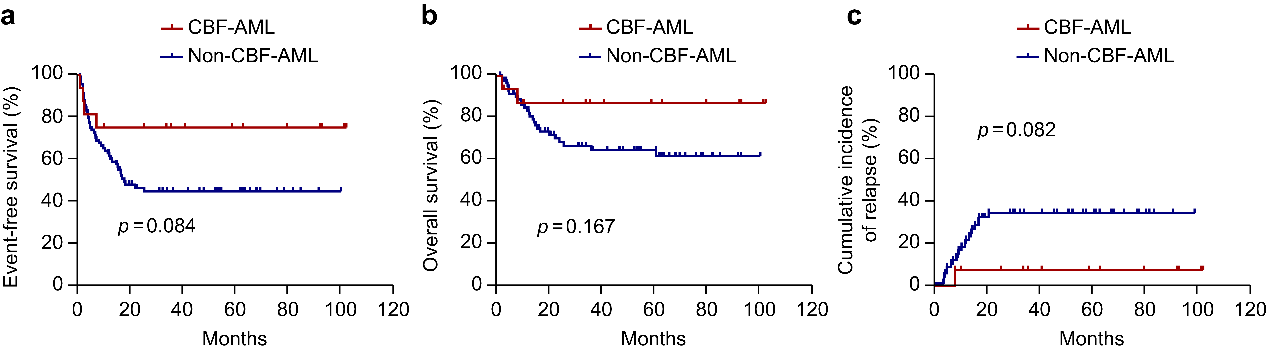
**

**Online Resource 11. Comparative outcomes of patients with CBF-AML harboring *FLT3*-ITD versus those with non–CBF-AML and *FLT3*-ITD**

Kaplan–Meier estimates for (a) event-free survival (EFS), (b) overall survival (OS), and (c) cumulative incidence of relapse (CIR).

CBF-AML (n = 16) *vs.* non–CBF-AML (n = 90):

- EFS: 5-year 75.0% ± 10.9% *vs.* 44.7% ±5.7% (*P* = 0.084, log-rank)
- OS: 5-year 87.1% ± 8.6% *vs.* 64.7% ± 5.8% (*P* = 0.167, log-rank)
- CIR: 7.7% ± 7.4% *vs.* 34.9% ± 6.2% (*P* = 0.082, Gray’s test)

No significant differences were observed across endpoints. Error bars/ribbons represent ±1 standard error.

**Online Resource 12.** Univariate Cox regression analysis of 279 pediatric patients with CBF-AML

| Risk factor | Overall survival | | | Event-free survival | | |
| --- | --- | --- | --- | --- | --- | --- |
|  | HR | 95% CI | *P* | HR | 95% CI | *P* |
| Age (≥10years) | 1.419 | 0.697–2.886 | 0.335 | 1.519 | 0.814–2.833 | 0.189 |
| Sex (male) | 0.929 | 0.466–1.852 | 0.833 | 1.104 | 0.599–2.035 | 0.750 |
| WBC ≥50×109/L) | 1.375 | 0.639–2.958 | 0.415 | 1.312 | 0.660–2.611 | 0.439 |
| Extramedullary involvement | 2.062 | 0.981–4.336 | 0.056 | 1.840 | 0.942–3.595 | 0.074 |
| *RUNX1-RUNX1T1* | 0.654 | 0.304–1.407 | 0.277 | 0.895 | 0.428–1.870 | 0.768 |
| *CBFB-MYH11* | 1.522 | 0.708–3.275 | 0.282 | 1.112 | 0.532–2.323 | 0.778 |
| *FLT3*-ITD mutation | 1.179 | 0.281–4.940 | 0.822 | 0.878 | 0.212–3.638 | 0.857 |
| -X/Y | 0.516 | 0.199–1.337 | 0.173 | 0.464 | 0.196–1.102 | 0.082 |
| Induction regimen  (FLAG-IDA) | 0.520 | 0.259–1.047 | 0.067 | 0.588 | 0.313–1.105 | 0.099 |

Abbreviations: CBF-AML, core-binding factor acute myeloid leukemia; WBC, white blood cell count; FLAG-IDA, fludarabine, cytarabine, granulocyte colony-stimulating factor, and idarubicin; DAE,daunorubicin, cytarabine, etoposide.
